# Supplementary material for: Synthesis of ultrathin Ni nanosheets for semihydrogenation of phenylacetylene to styrene under mild conditions
Source: Royal Society of Chemistry journal article supplement (doi:10.1039/c8nr00532j), 2018-01-01
Supplement: c8nr00532j1.pdf [file c8nr00532j1.pdf]

*Supporting Information for*

**Synthesis of ultrathin Ni nanosheets for semihydrogenation of phenylacetylene to styrene under mild conditions**

Jing-Wen Yu,<sup>a,‡</sup> Xin-Yu Wang,<sup>a,‡</sup> Chen-Yue Yuan,<sup>a</sup> Wei-Zhen Li,<sup>b</sup> Yu-Hao Wang<sup>a</sup> and Ya-Wen Zhang<sup>a\*</sup>

<sup>a</sup> Beijing National Laboratory for Molecular Sciences (BNLMS), College of Chemistry and Molecular Engineering, Peking University, Beijing 100871, China. E-mail: ywzhang@pku.edu.cn

<sup>b</sup> National Institute of Clean-And-Low-Carbon Energy, Future Science & Technology City, Changping District, Beijing 102211, China.

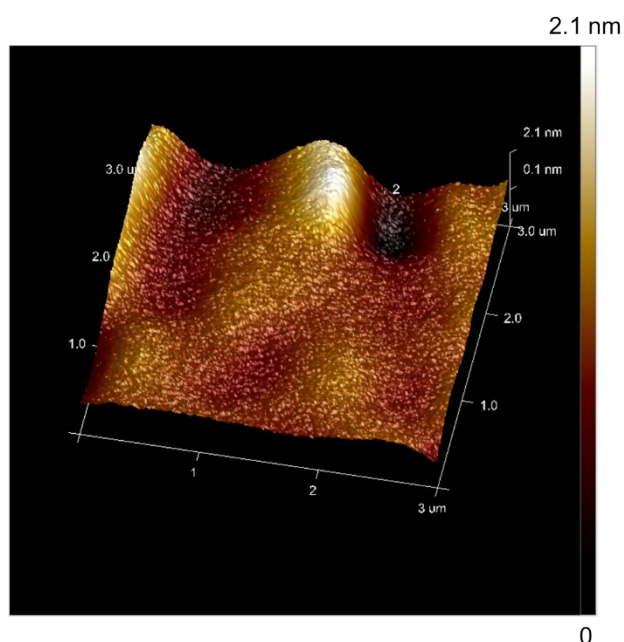

**Fig. S1** AFM image of Ni NSs formed at 4 h.

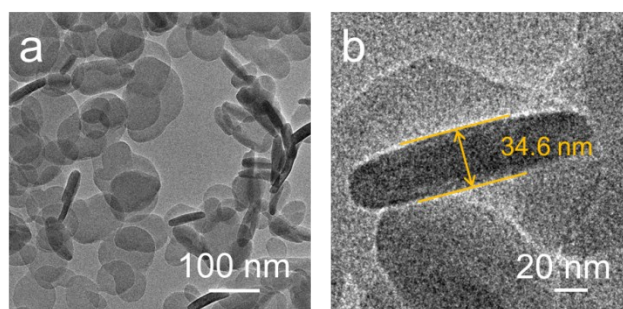

**Fig. S2** TEM images of Ni NSs synthesized with no amine addition.

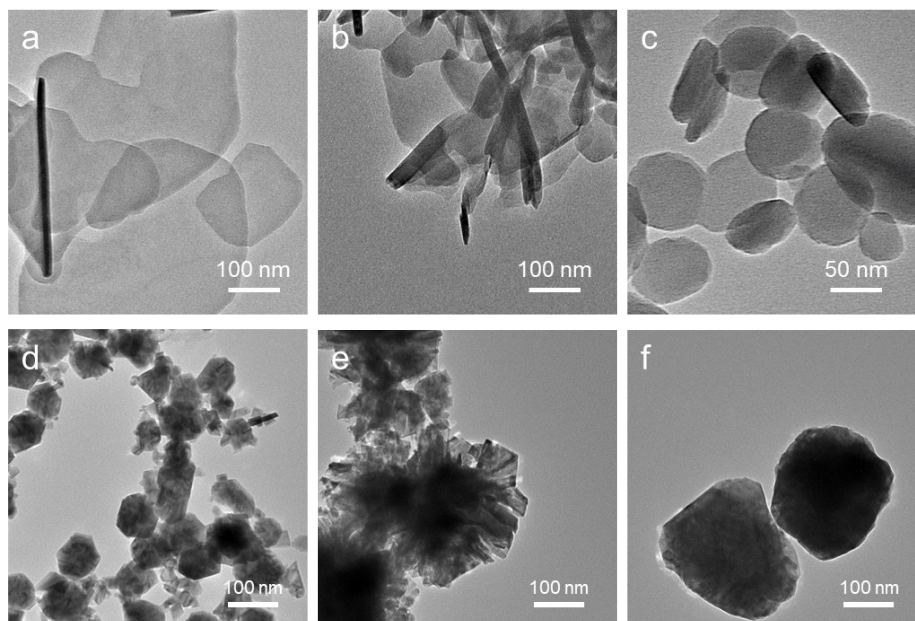

**Fig. S3** TEM images of Ni NSs synthesized using (a) *n*-octylamine, (b) benzylamine, (c) triethylamine, (d) 2-butylamine, (e) cholamine and (f) ethanediamine as shape controlling reagents, respectively.

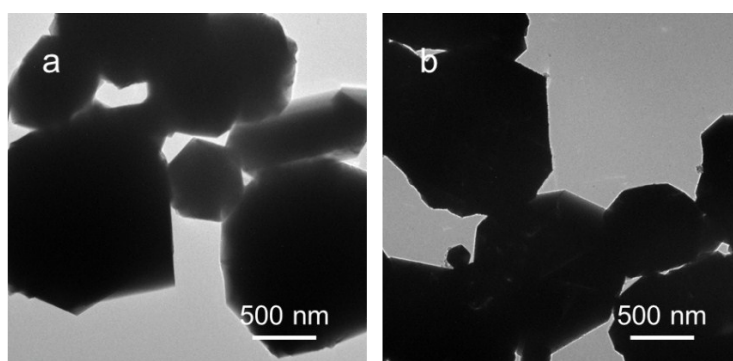

**Fig. S4** TEM images of Ni NSs formed at (a) 8.5 h and (b) 18 h reaction times.

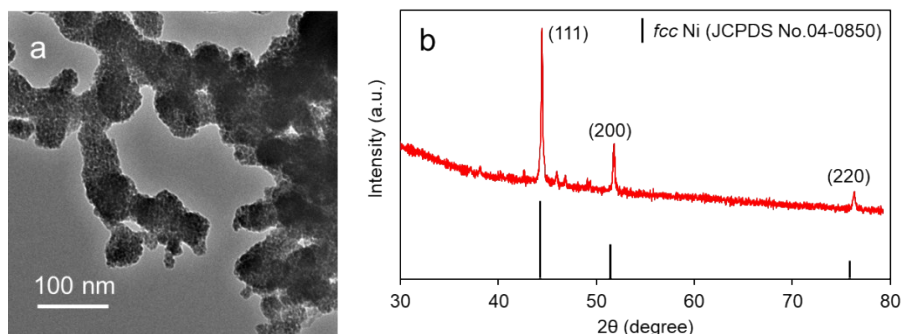

**Fig. S5** (a) TEM image and (b) XRD pattern of Ni-B NPs prepared with sodium borohydride reduction method. Black vertical lines in (b) represent the standard data for *fcc* Ni (JCPDS No.04-0850).

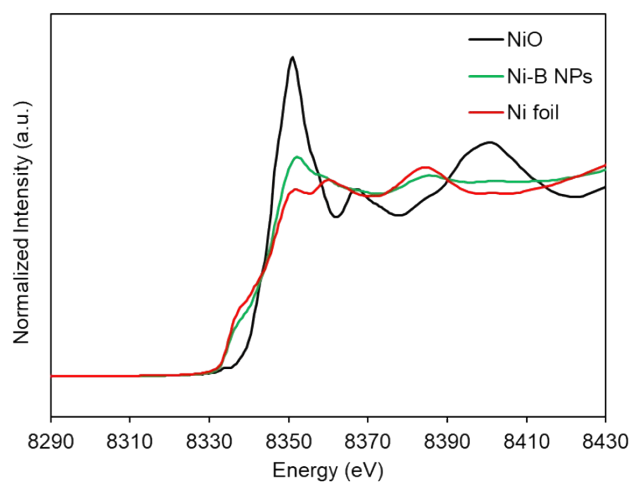

**Fig. S6** XANES spectrum of Ni-B NPs compared to those of Ni foil and NiO standard samples.

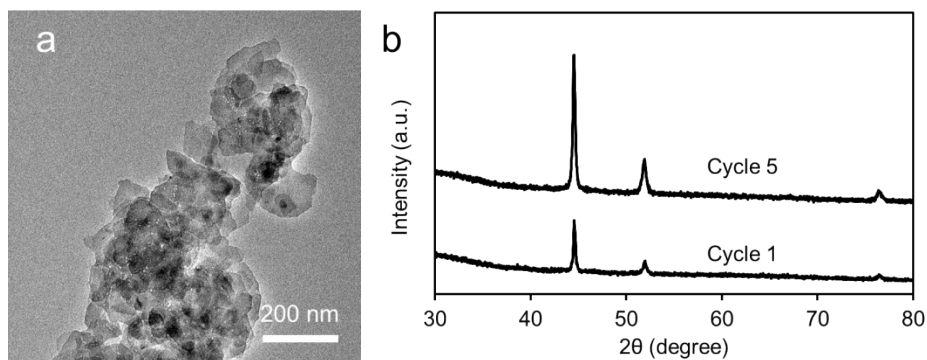

**Fig. S7** (a) TEM image of Ni-4h after recycling for 5 times. (b) XRD patterns of Ni-4h after recycling for 1 and 5 times.

**Table S1** EXAFS fitting results of Ni NSs formed at different solvothermal reaction times.<sup>a</sup>

| Sample | Coordination | $R$ (Å)         | CN          | $\sigma^2$ (nm <sup>2</sup> ) | $E_0$ shift (eV) | $R$ factor |
|--------|--------------|-----------------|-------------|-------------------------------|------------------|------------|
| 1h     | Ni-O         | 2.055±0.01<br>1 | 4.6±0.<br>6 | 0.006±0.00<br>2               | -4.8             | 3E-3       |
|        | Ni-Ni (NiO)  | 3.126±0.00<br>8 | 5.9±0.<br>9 | 0.009±0.00<br>1               | -3.0             |            |
| 1.5h   | Ni-O         | 2.049±0.01<br>2 | 4.8±0.<br>5 | 0.006±0.00<br>2               | -4.1             | 5E-3       |
|        | Ni-Ni (NiO)  | 3.119±0.00<br>9 | 4.8±0.<br>6 | 0.007±0.00<br>1               | -2.3             |            |
| 2h     | Ni-Ni (Ni)   | 2.516±0.02<br>5 | 1.8±1.<br>7 | 0.015±0.01<br>1               | 2.1              | 3E-3       |
|        | Ni-O         | 2.066±0.02<br>5 | 3.2±0.<br>5 | 0.008±0.00<br>3               | 1.2              |            |
|        | Ni-Ni (NiO)  | 3.130±0.01<br>0 | 2.0±0.<br>6 | 0.004±0.00<br>2               | 2.1              |            |
| 3h     | Ni-Ni (Ni)   | 2.481±0.00<br>7 | 5.4±0.<br>7 | 0.005±0.00<br>1               | -6.8             | 2E-3       |
| 4h     | Ni-Ni (Ni)   | 2.485±0.00<br>3 | 7.8±0.<br>6 | 0.006±0.00<br>1               | 7.1              | 1E-3       |
| 5.5h   | Ni-Ni (Ni)   | 2.486±0.00<br>3 | 9.9±0.<br>8 | 0.006±0.00<br>1               | 3.8              | 1E-3       |

<sup>a</sup>  $R$  is the bond length; CN is the coordination number;  $\sigma^2$  is the change in the Debye-Waller factor value relative to the reference factor;  $E_0$  shift is inner potential correction to account for the difference in the inner potential between the sample and the reference.

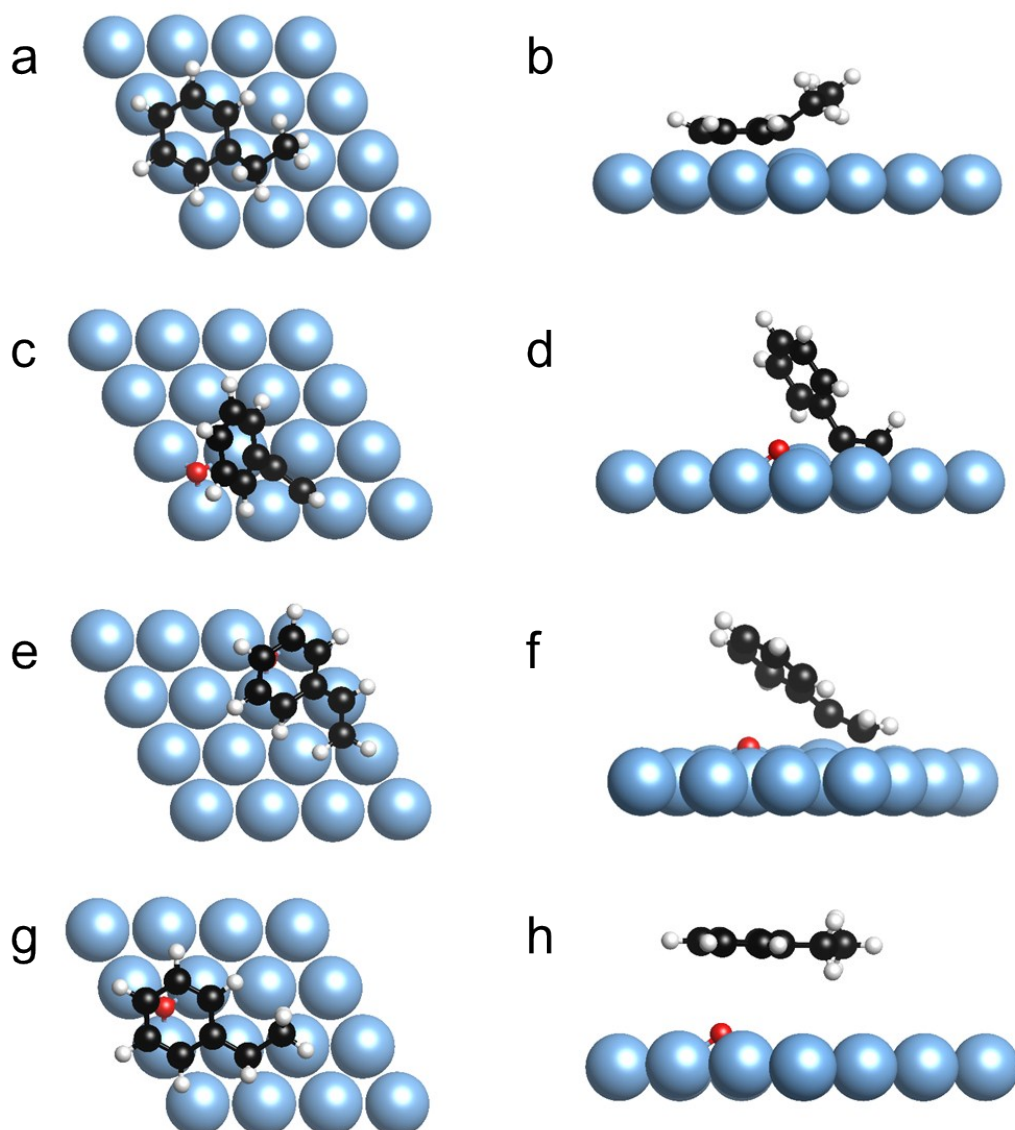

**Fig. S8** Adsorption configurations of (a,b) ethylbenzene (EB) on Ni (111) and (c,d) phenylacetylene (PA), (e,f) styrene (ST), (g,h) ethylbenzene (EB) on 1/16 monolayer O covered Ni (111) surface. The blue, black, white and red balls represent modelled Ni, C, H and O atoms.



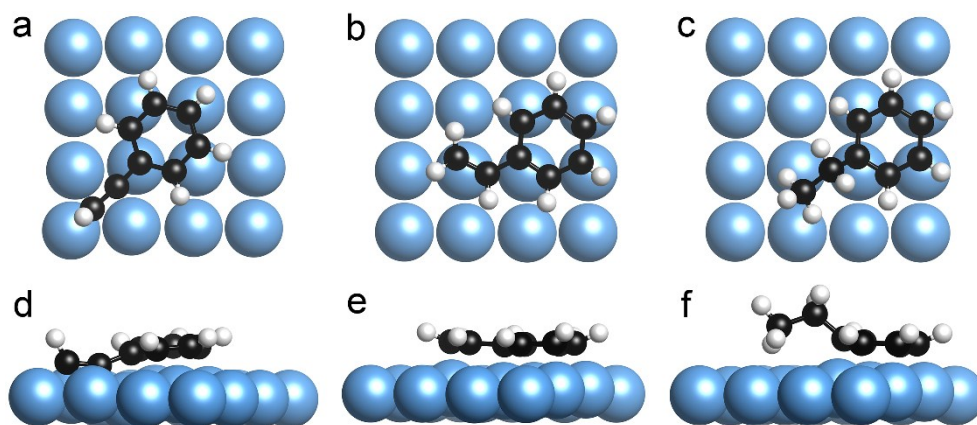

**Fig. S9** Adsorption configurations of (a, d) phenylacetylene (PA), (b, e) styrene (ST), (c, f) ethylbenzene (EB) on Ni (100) surface. The blue, black, white balls represent modelled Ni, C and H atoms.

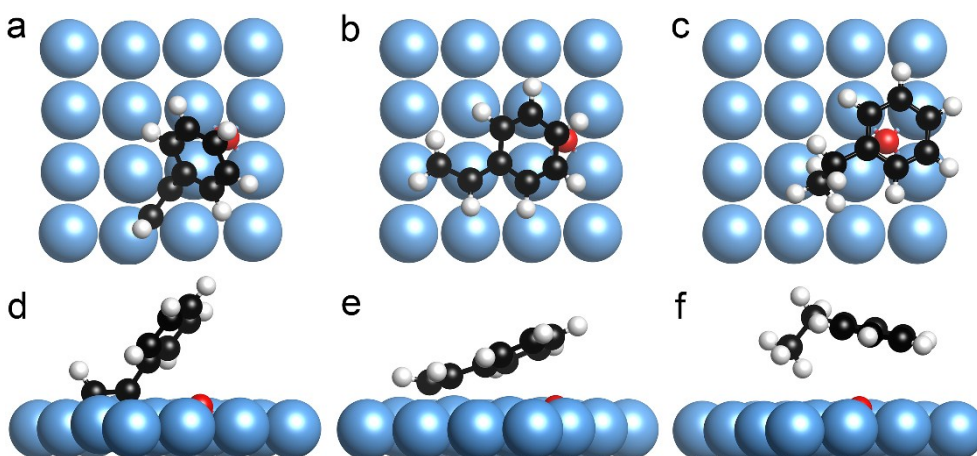

**Fig. S10** Adsorption configurations of (a, d) phenylacetylene (PA), (b, e) styrene (ST), (c, f) ethylbenzene (EB) on 1/16 monolayer O covered Ni (100) surface. The blue, black, white and red balls represent modelled Ni, C, H and O atoms.

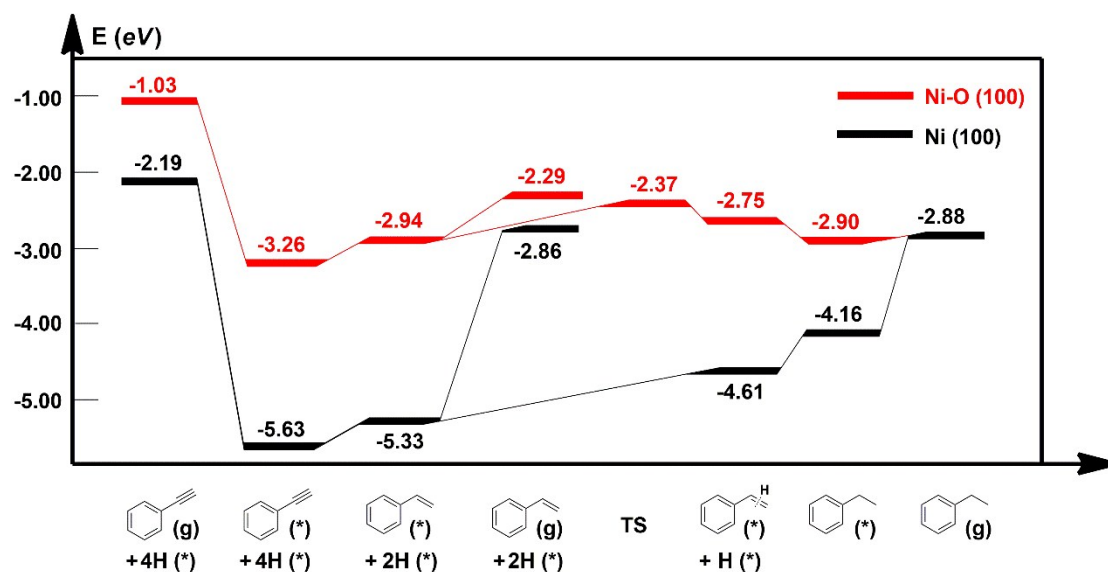

**Fig. S11** Schematic potential surface of PA semihydrogenation on Ni(100) and Ni(100) with 1/16 ML oxygen coverage. (\*) represents the adsorbed intermediates, and (g) represents the gas phase intermediates and products. All zero-point correlated energies are with respect to the gas phase PA and two gas phase hydrogen molecules (0 eV). TS represents the transition state.
